# Supplementary material for: Modulating A site compositions of europium(iii)-doped double-perovskite niobate phosphors
Source: Royal Society of Chemistry journal article supplement (doi:10.1039/d2qi02044k), 2022-01-01
Supplement: d2qi02044k1.pdf [file d2qi02044k1.pdf]

## Supporting Information

### Modulating A site compositions of europium(III)-doped double-perovskite niobate phosphors

Yongbin Hua<sup>a</sup>, Tian Wang<sup>a</sup>, Jae Su Yu<sup>a,\*</sup>, Weiguang Ran<sup>b,\*</sup>, and Li Li<sup>c,\*</sup>

<sup>a</sup>Department of Electronics and Information Convergence Engineering, Institute for Wearable Convergence Electronics, Kyung Hee University, Yongin-si, Gyeonggi-do 17104, Republic of Korea.

<sup>b</sup>Department of Chemistry and Chemical Engineering, Qufu Normal University, Qufu 273165, P. R. China.

<sup>c</sup>School of Science, Chongqing University of Posts and Telecommunications, Chongqing 400065, P. R. China

#### Table of contents of the supporting information.

| Order | Contents                                                                                                                 | Page    |
|-------|--------------------------------------------------------------------------------------------------------------------------|---------|
| 1     | Rietveld refinement results of optimal samples                                                                           | S2      |
| 2     | Crystallographic data                                                                                                    | S2-S3   |
| 3     | Calculated lifetime results                                                                                              | S4-S6   |
| 4     | Crystal structure diagrams                                                                                               | S7-S8   |
| 5     | Zoomed XRD patterns and Rietveld XRD refinements                                                                         | S9      |
| 6     | Elemental mappings                                                                                                       | S10-S11 |
| 7     | FE-SEM images                                                                                                            | S11     |
| 8     | Normalized PL emission intensity and plot of log(doping concentration) vs. log (emission intensity/doping concentration) | S12     |
| 9     | PL emission spectra under same testing conditions and asymmetry ratio                                                    | S13     |
| 10    | Decay curves and chromaticity coordinates                                                                                | S14-S15 |
| 11    | Quantum yield and chromaticity coordinates of the packaged LED devices                                                   | S16-S17 |

**Table S1.** Rietveld refinement results of optimal samples.

|                           | <b>CINO:0.35Eu<sup>3+</sup></b>     | <b>SINO:0.1Eu<sup>3+</sup></b>      | <b>BINO:0.3Eu<sup>3+</sup></b>      |
|---------------------------|-------------------------------------|-------------------------------------|-------------------------------------|
| <b>Radiation</b>          | Cu K $\alpha_1$ radiation           |                                     |                                     |
| <b>Structure</b>          | Monoclinic<br>(P21/n (14))          | Monoclinic<br>(P21/n (14))          | Cubic<br>(F m-3 m (225))            |
|                           | $a_1 = 5.550 \text{ \AA}$           | $a_2 = 5.757 \text{ \AA}$           | $a_3 = 8.343 \text{ \AA}$           |
|                           | $b_1 = 5.760 \text{ \AA}$           | $b_2 = 5.764 \text{ \AA}$           | $b_3 = 8.343 \text{ \AA}$           |
|                           | $c_1 = 7.989 \text{ \AA}$           | $c_2 = 8.147 \text{ \AA}$           | $c_3 = 8.343 \text{ \AA}$           |
| <b>Lattice parameters</b> | $\alpha_1 = 90.0000^\circ$          | $\alpha_2 = 90.0000^\circ$          | $\alpha_3 = 90.0000^\circ$          |
|                           | $\beta_1 = 90.0555^\circ$           | $\beta_2 = 89.9411^\circ$           | $\beta_3 = 90.0000^\circ$           |
|                           | $\gamma_1 = 90.0000^\circ$          | $\gamma_2 = 90.0000^\circ$          | $\gamma_3 = 90.0000^\circ$          |
|                           | $V_1 \approx 255.392 \text{ \AA}^3$ | $V_2 \approx 270.345 \text{ \AA}^3$ | $V_3 \approx 580.720 \text{ \AA}^3$ |

**Table S2.** Crystallographic data of the CINO:0.35Eu<sup>3+</sup> phosphor.

| Name  | Fractional coordinates |          |          | Occ. | Site |
|-------|------------------------|----------|----------|------|------|
| Ca    | 0.507745               | 0.051501 | 0.260241 | 1    | 4e   |
| In/Eu | 0.000000               | 0.000000 | 0.000000 | 1    | 2a   |
| Nb    | 0.000000               | 0.000000 | 0.500000 | 1    | 2b   |
| O(1)  | 0.491853               | 0.954205 | 0.793617 | 1    | 4e   |
| O(2)  | 0.128308               | 0.307279 | 1.056621 | 1    | 4e   |
| O(3)  | 0.110920               | -0.19688 | 0.256516 | 1    | 4e   |

**Table S3.** Crystallographic data of the SINO:0.1Eu<sup>3+</sup> phosphor.

| Name  | Fractional coordinates |           |          | Occ. | Site |
|-------|------------------------|-----------|----------|------|------|
| Sr    | 0.504600               | -0.021400 | 0.248600 | 1    | 4e   |
| In/Eu | 0.000000               | 0.000000  | 0.000000 | 1    | 2a   |
| Nb    | 0.500000               | 0.500000  | 0.000000 | 1    | 2b   |
| O(1)  | 0.287900               | 0.775700  | 0.966300 | 1    | 4e   |
| O(2)  | 0.224300               | 0.287900  | 0.966300 | 1    | 4e   |

|      |          |          |          |   |    |
|------|----------|----------|----------|---|----|
| O(3) | 0.067400 | 0.013400 | 0.260600 | 1 | 4e |
|------|----------|----------|----------|---|----|

**Table S4.** Crystallographic data of the BINO:0.3Eu<sup>3+</sup> phosphor.

| Name  | Fractional coordinates |          |          | Occ. | Site |
|-------|------------------------|----------|----------|------|------|
| Ba    | 0.250000               | 0.250000 | 0.250000 | 1    | 8c   |
| In/Eu | 0.000000               | 0.000000 | 0.000000 | 1    | 4a   |
| Nb    | 0.500000               | 0.000000 | 0.000000 | 1    | 4b   |
| O     | 0.261857               | 0.000000 | 0.000000 | 1    | 24e  |

**Table S5.** In-O distance in the [InO<sub>6</sub>] octahedral.

|         | CINO    | SINO    | BINO    |
|---------|---------|---------|---------|
| In-O(1) | 2.144 Å | 2.112 Å |         |
| In-O(2) | 2.170 Å | 2.112 Å | 2.094 Å |
| In-O(3) | 2.150 Å | 2.150 Å |         |

**Table S6.** O-In-O angle in the [InO<sub>6</sub>] octahedral.

|              | CINO   | SINO   | BINO   |
|--------------|--------|--------|--------|
| O(1)-In-O(2) | 89.56° | 90.90° |        |
| O(1)-In-O(3) | 91.76° | 90.50° | 90.00° |
| O(2)-In-O(3) | 87.68° | 90.60° |        |

**Table S7.** Calculated lifetime results of CINO:0.35Eu<sup>3+</sup> phosphor as a function of temperature.

| T (K) | R <sup>2</sup> | A <sub>1</sub> | τ <sub>1</sub> (ms) | A <sub>2</sub> | τ <sub>2</sub> (ms) | Average τ (ms)* |
|-------|----------------|----------------|---------------------|----------------|---------------------|-----------------|
| 318   | 0.99988        | 16814.0373     | 0.5433              | 16814.0373     | 0.5433              | 0.543           |
| 338   | 0.99987        | 16926.12197    | 0.54225             | 16926.12197    | 0.54225             | 0.542           |
| 358   | 0.99989        | 16920.02447    | 0.5412              | 16920.02447    | 0.5412              | 0.541           |
| 378   | 0.9999         | 16879.47728    | 0.54089             | 16879.47728    | 0.54089             | 0.541           |
| 398   | 0.99992        | 16832.08815    | 0.54078             | 16832.08815    | 0.54078             | 0.541           |
| 418   | 0.9999         | 16768.08506    | 0.53915             | 16768.08506    | 0.53915             | 0.539           |
| 438   | 0.9999         | 16784.49744    | 0.53795             | 16784.49744    | 0.53795             | 0.538           |
| 458   | 0.9999         | 16780.78139    | 0.53745             | 16780.78139    | 0.53745             | 0.539           |
| 478   | 0.9999         | 16770.85855    | 0.53434             | 16770.85855    | 0.53434             | 0.534           |
| 498   | 0.99992        | 16651.56823    | 0.53332             | 16651.56823    | 0.53332             | 0.533           |
| 518   | 0.99992        | 30401.54064    | 0.52645             | 183.31514      | 1.23392             | 0.536           |
| 538   | 0.9999         | 63.42827       | 1.69871             | 26810.50767    | 0.52484             | 0.534           |
| 558   | 0.99988        | 19616.78506    | 0.49788             | 3126.23586     | 0.63912             | 0.522           |
| 578   | 0.99989        | 638.08585      | 0.77912             | 19467.04084    | 0.4938              | 0.508           |
| 598   | 0.99984        | 16951.02106    | 0.48776             | 1171.56358     | 0.25001             | 0.480           |

**\*Round to the nearest thousandth.**

**Table S8.** Calculated lifetime results of SINO:0.1Eu<sup>3+</sup> phosphor as a function of temperature.

| T (K) | R <sup>2</sup> | A <sub>1</sub> | τ <sub>1</sub> (ms) | A <sub>2</sub> | τ <sub>2</sub> (ms) | Average τ (ms)* |
|-------|----------------|----------------|---------------------|----------------|---------------------|-----------------|
| 318   | 0.9984         | 304.0131       | 1.09559             | 1713.71073     | 2.98917             | 2.87            |
| 338   | 0.99836        | 498.64467      | 1.54197             | 1494.81201     | 3.08165             | 2.86            |
| 358   | 0.99847        | 1531.75946     | 2.98206             | 457.95365      | 1.50258             | 2.79            |
| 378   | 0.99845        | 482.9848       | 1.47554             | 1518.18704     | 2.95444             | 2.75            |
| 398   | 0.99862        | 1661.07802     | 2.80419             | 317.51698      | 1.15729             | 2.68            |
| 418   | 0.99853        | 1575.99006     | 2.79875             | 441.68337      | 1.3473              | 2.63            |
| 438   | 0.99861        | 1508.65165     | 2.79352             | 522.72066      | 1.33096             | 2.59            |
| 458   | 0.9985         | 1709.1536      | 2.59044             | 313.74674      | 0.8482              | 2.49            |
| 478   | 0.99847        | 1586.3114      | 2.59439             | 406.71471      | 0.96549             | 2.45            |
| 498   | 0.99846        | 472.71421      | 0.91513             | 1569.8152      | 2.51839             | 2.36            |
| 518   | 0.99859        | 404.99643      | 0.67349             | 1650.57819     | 2.39332             | 2.28            |
| 538   | 0.99859        | 1575.79455     | 2.37846             | 452.8022       | 0.73722             | 2.24            |
| 558   | 0.99835        | 1507.49928     | 2.28598             | 413.20036      | 0.57086             | 2.18            |
| 578   | 0.99832        | 1539.76225     | 2.26478             | 456.73926      | 0.53641             | 2.15            |
| 598   | 0.99835        | 421.33094      | 0.51177             | 1546.10749     | 2.20871             | 2.11            |

\*Round to the nearest hundredth.

**Table S9.** Calculated lifetime results of BINO:0.3Eu<sup>3+</sup> phosphor as a function of temperature.

| T (K) | R <sup>2</sup> | A <sub>1</sub> | τ <sub>1</sub> (ms) | A <sub>2</sub> | τ <sub>2</sub> (ms) | Average τ (ms)* |
|-------|----------------|----------------|---------------------|----------------|---------------------|-----------------|
| 318   | 0.99842        | 7291.77525     | 1.65356             | 26504.94716    | 0.13657             | 1.30            |
| 338   | 0.99809        | 26877.52186    | 0.12423             | 6984.93082     | 1.5929              | 1.25            |
| 358   | 0.99763        | 6685.06103     | 1.50942             | 27598.15858    | 0.1078              | 1.19            |
| 378   | 0.99642        | 27875.27556    | 0.09469             | 6582.22505     | 1.40793             | 1.12            |
| 398   | 0.99526        | 6304.85194     | 1.33196             | 28373.4434     | 0.08518             | 1.05            |
| 418   | 0.9942         | 6129.25329     | 1.29662             | 28626.50801    | 0.08141             | 1.02            |
| 438   | 0.99255        | 28933.73566    | 0.07517             | 6053.69541     | 1.243               | 0.98            |
| 458   | 0.99175        | 6136.03345     | 1.17847             | 29542.68034    | 0.06918             | 0.93            |
| 478   | 0.99141        | 29916.9381     | 0.06611             | 6101.48707     | 1.12973             | 0.89            |
| 498   | 0.99048        | 6157.04395     | 1.0731              | 30537.81115    | 0.06167             | 0.85            |
| 518   | 0.98947        | 6186.80397     | 0.99483             | 32010.73315    | 0.05477             | 0.79            |
| 538   | 0.98879        | 6231.19757     | 0.93132             | 32840.38335    | 0.05107             | 0.73            |
| 558   | 0.98754        | 34565.5331     | 0.04599             | 6129.90678     | 0.85608             | 0.67            |
| 578   | 0.98702        | 6255.28308     | 0.77036             | 37288.74676    | 0.03983             | 0.60            |
| 598   | 0.98723        | 6335.48196     | 0.68706             | 40188.03512    | 0.0352              | 0.53            |

\*Round to the nearest hundredth.

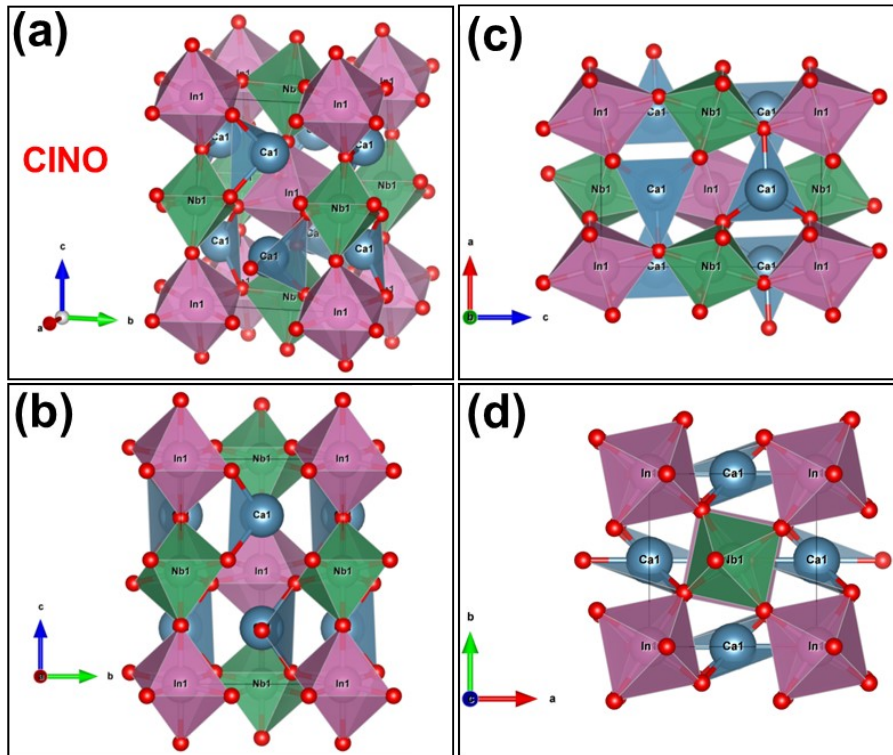

Fig. S1 (a-d) Crystal structure of the CINO material.

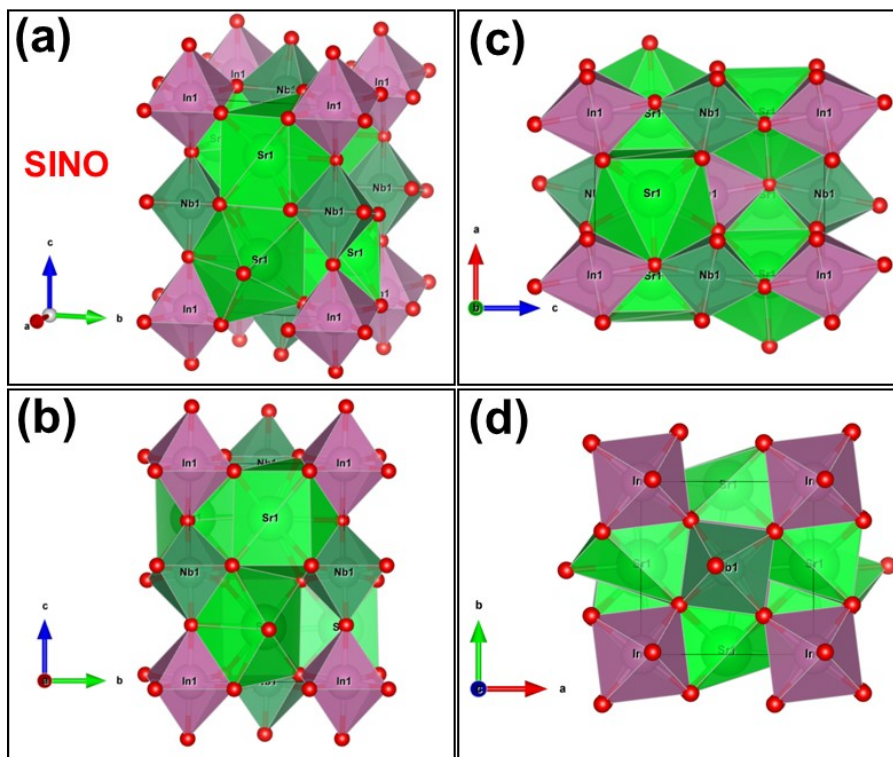

Fig. S2 (a-d) Crystal structure of the SINO material

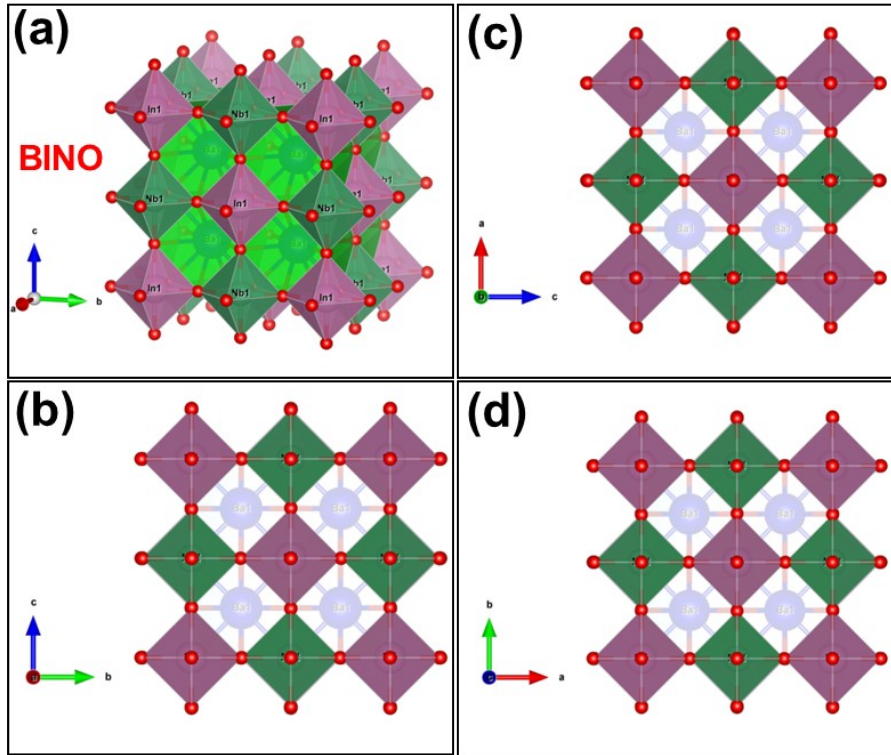

**Fig. S3** (a-d) Crystal structure of the BINO material.



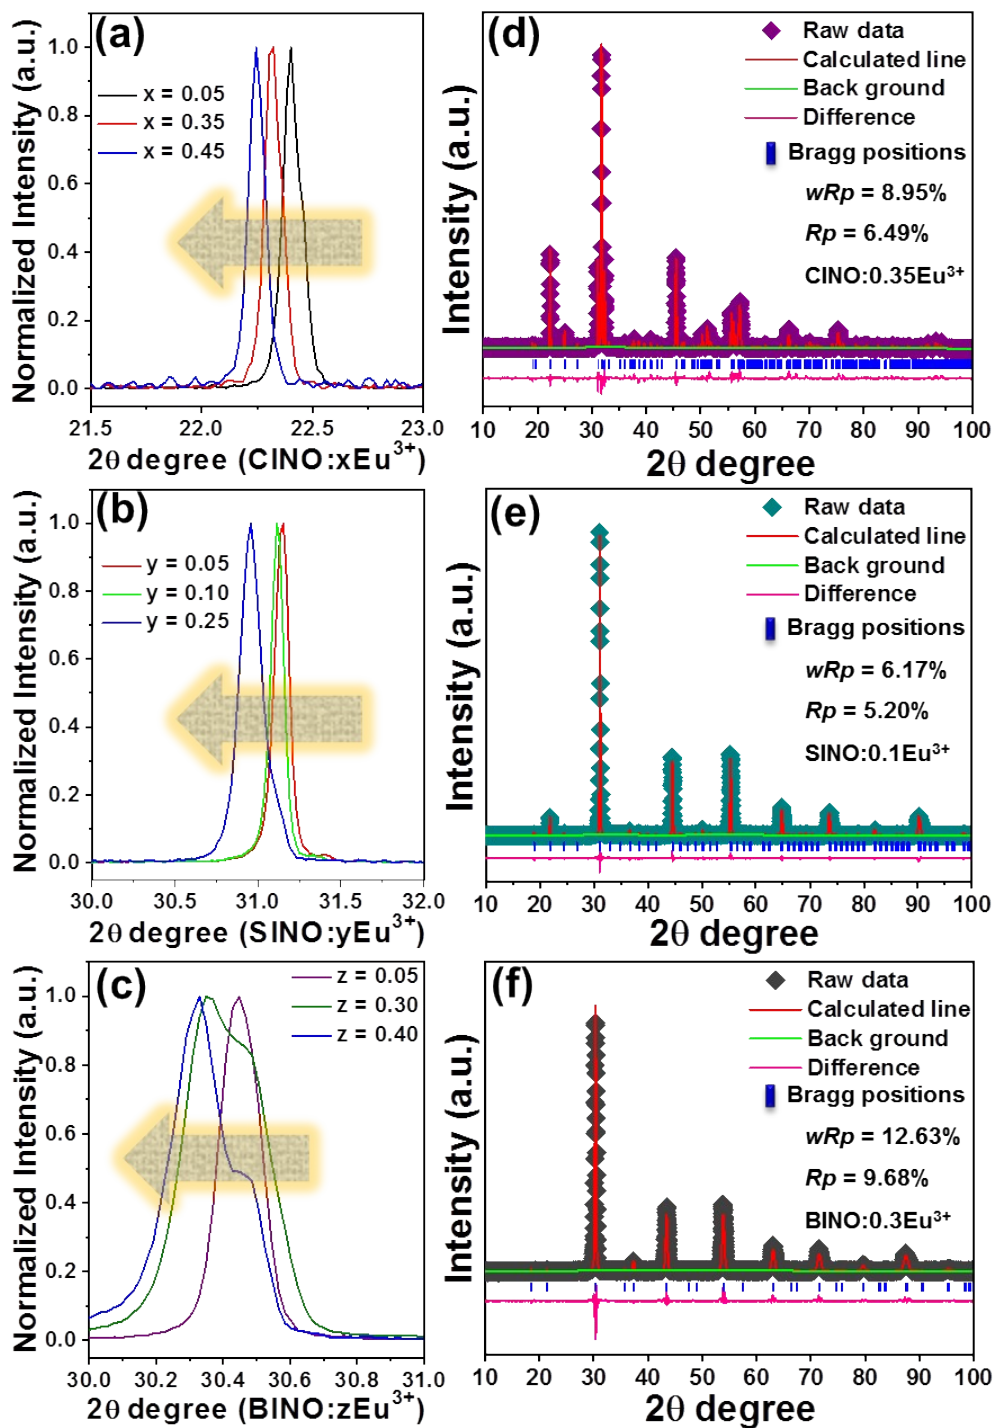

**Fig. S4** Zoomed XRD patterns of the (a) CINO: $x\text{Eu}^{3+}$ , (b) SINO: $y\text{Eu}^{3+}$ , and (c) BINO: $z\text{Eu}^{3+}$  phosphors. Rietveld XRD refinements of (d) CINO:0.35 $\text{Eu}^{3+}$ , (e) SINO:0.1 $\text{Eu}^{3+}$ , and BINO:0.3 $\text{Eu}^{3+}$  phosphors.

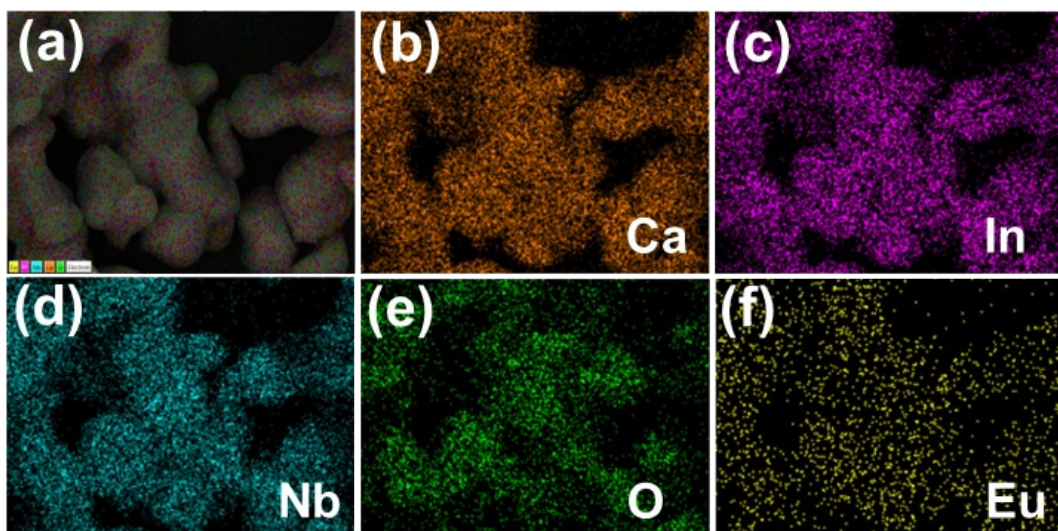

**Fig. S5** (a-f) Elemental mappings of the CINO:0.1Eu<sup>3+</sup> phosphor.

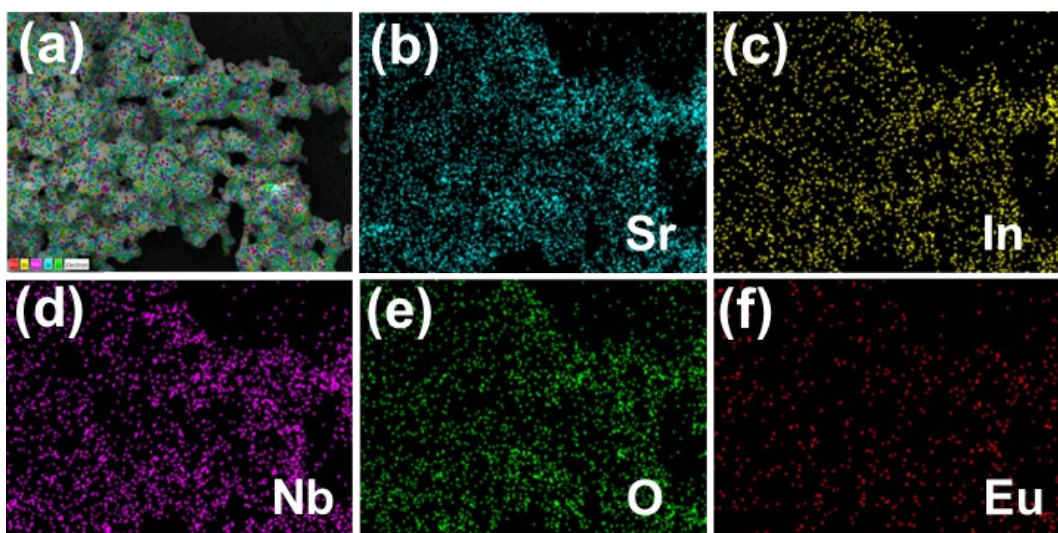

**Fig. S6** (a-f) Elemental mappings of the SINO:0.1Eu<sup>3+</sup> phosphor.



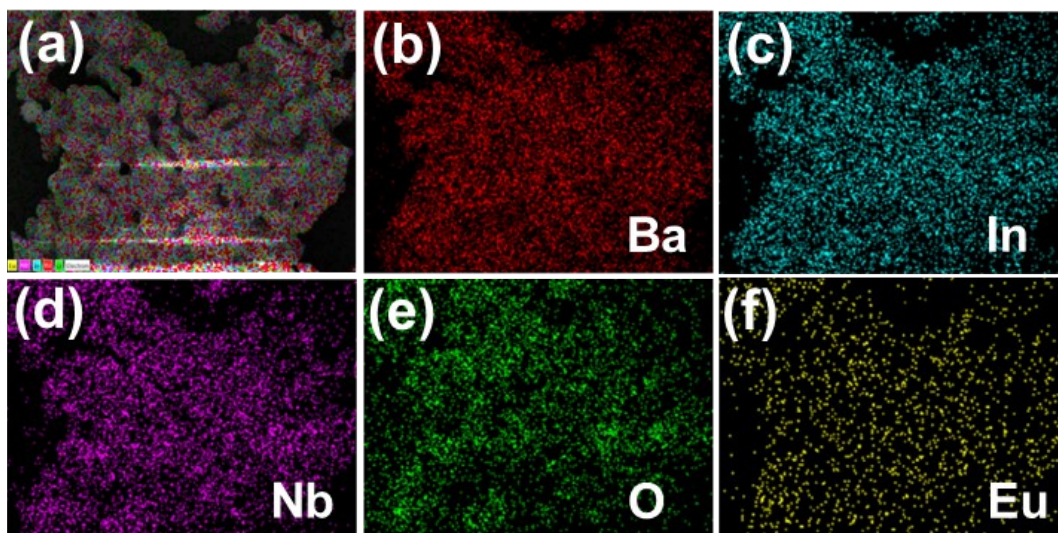

**Fig. S7** (a-f) Elemental mappings of the BINO:0.1Eu<sup>3+</sup> phosphor.

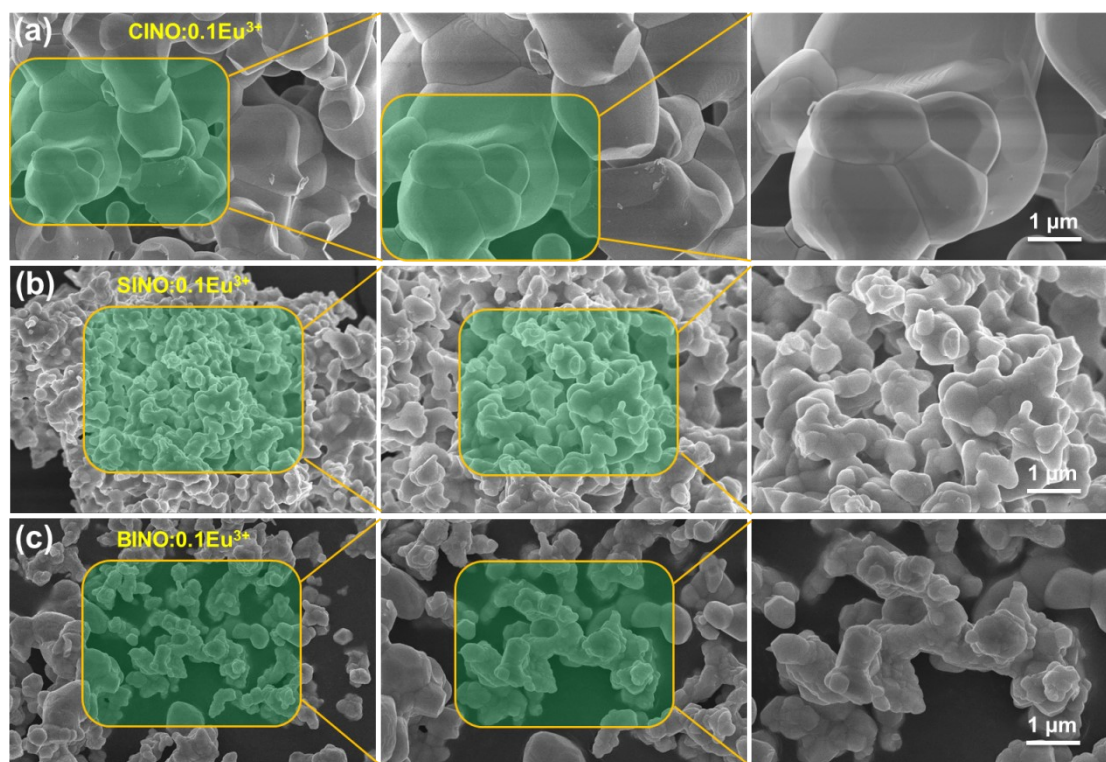

**Fig. S8** FE-SEM images of the typical (a) CINO:0.1Eu<sup>3+</sup>, (b) SINO:0.1Eu<sup>3+</sup>, and (c) BINO:0.1Eu<sup>3+</sup> phosphors under various magnifications.

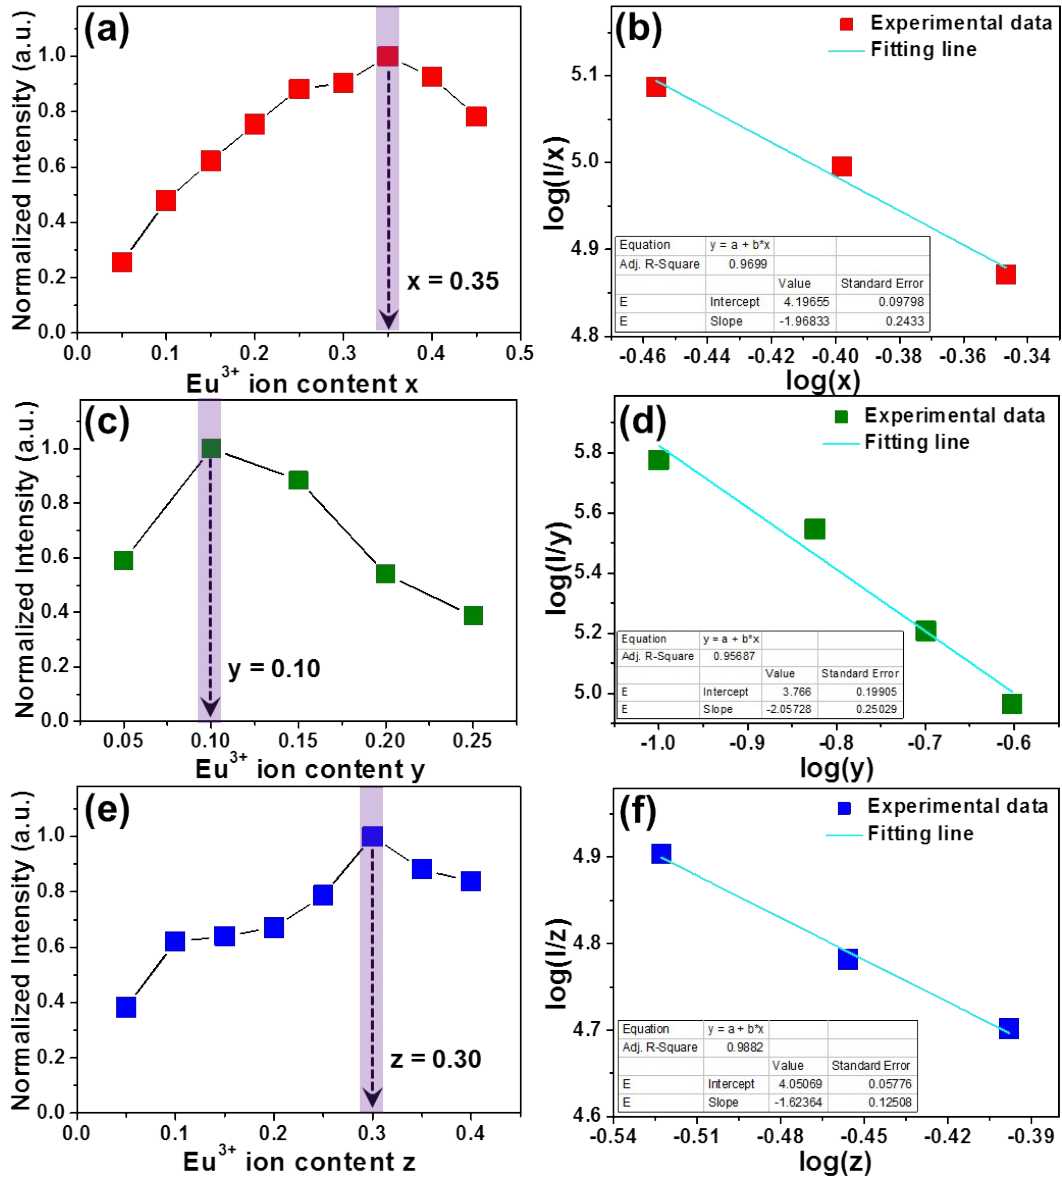

**Fig. S9** Normalized emission intensity and plot of  $\log(\text{doping concentration})$  vs.  $\log(\text{emission intensity/doping concentration})$  of (a,b)  $\text{CINO}:x\text{Eu}^{3+}$ , (c,d)  $\text{SINO}:y\text{Eu}^{3+}$ , and (e,f)  $\text{BINO}:z\text{Eu}^{3+}$  phosphors.

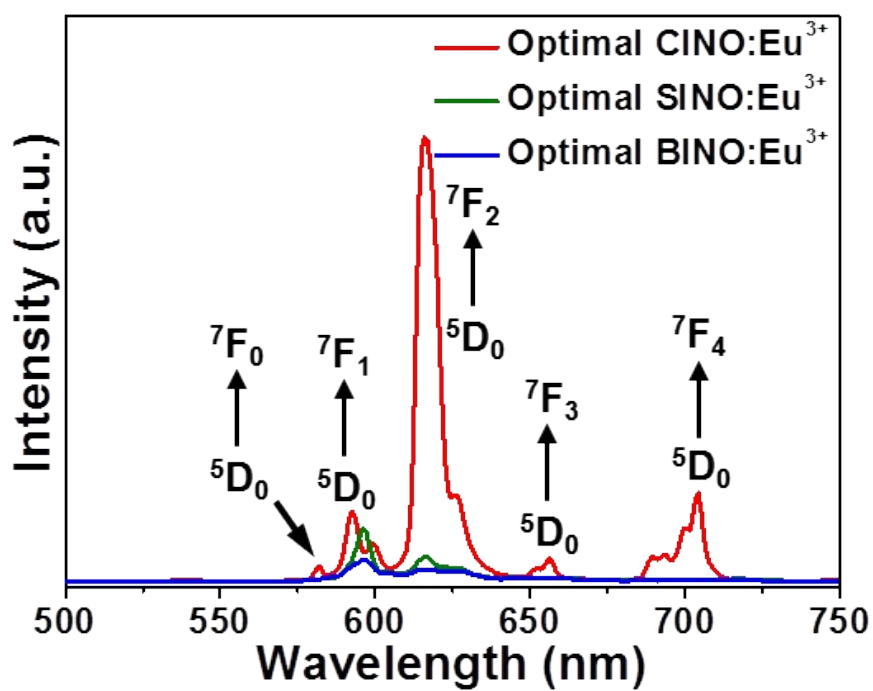

Fig. S10 PL emission spectra of the optimal resultant samples under same testing conditions.

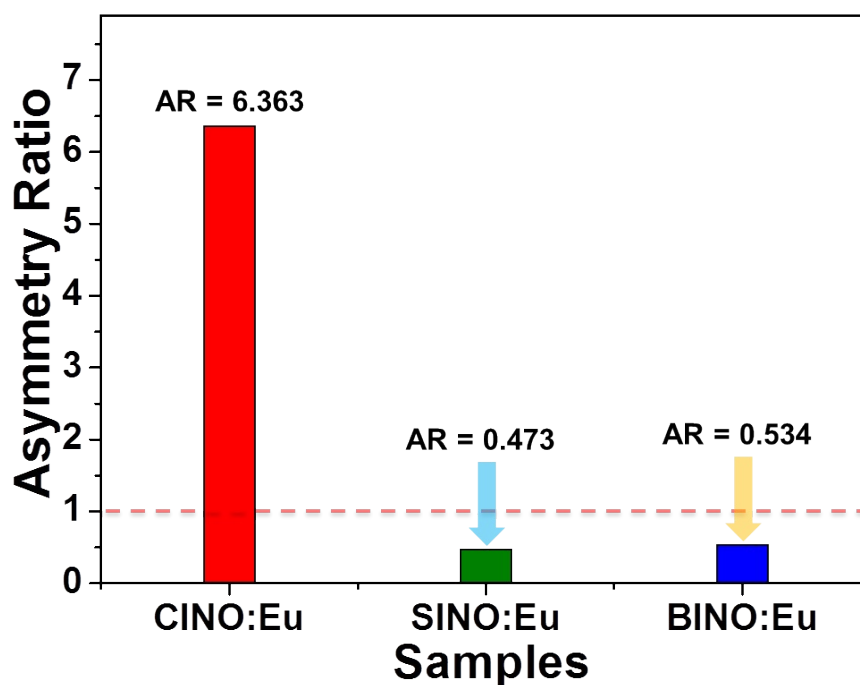

Fig. S11 Asymmetry ratio of the optimal resultant samples.

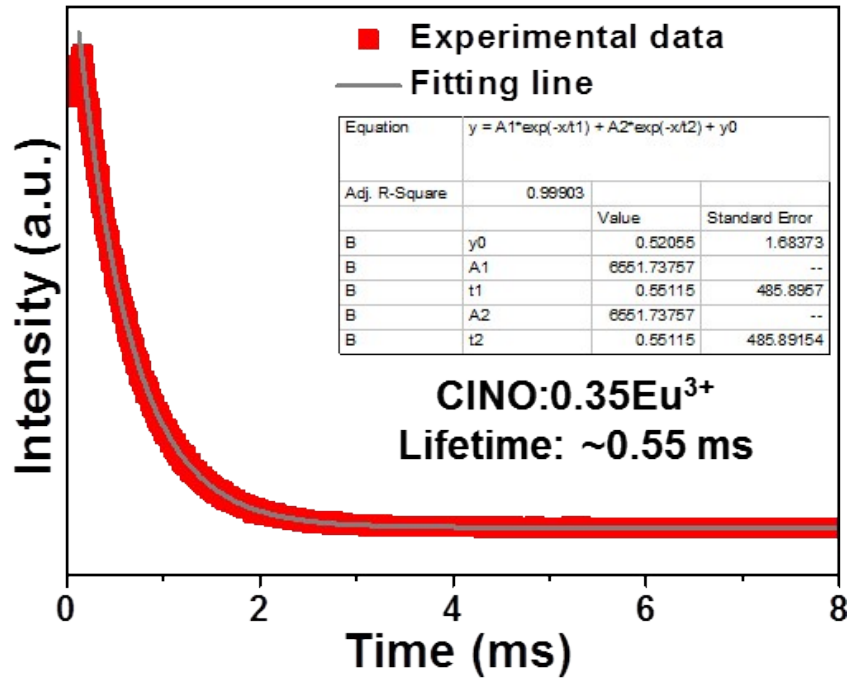

Fig. S12 Decay curve of the CINO:0.35Eu<sup>3+</sup> phosphor.

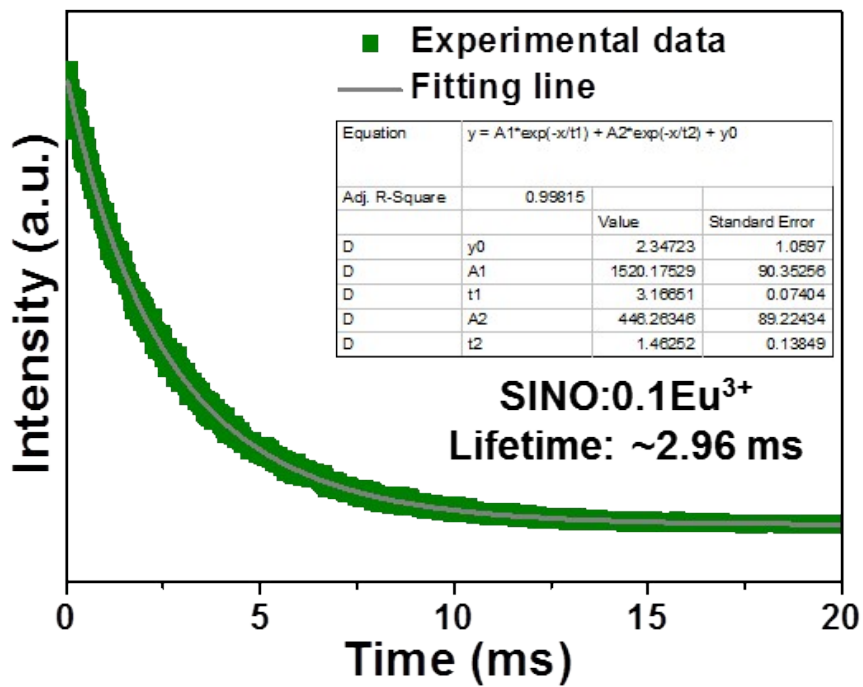

Fig. S13 Decay curve of the SINO:0.1Eu<sup>3+</sup> phosphor.

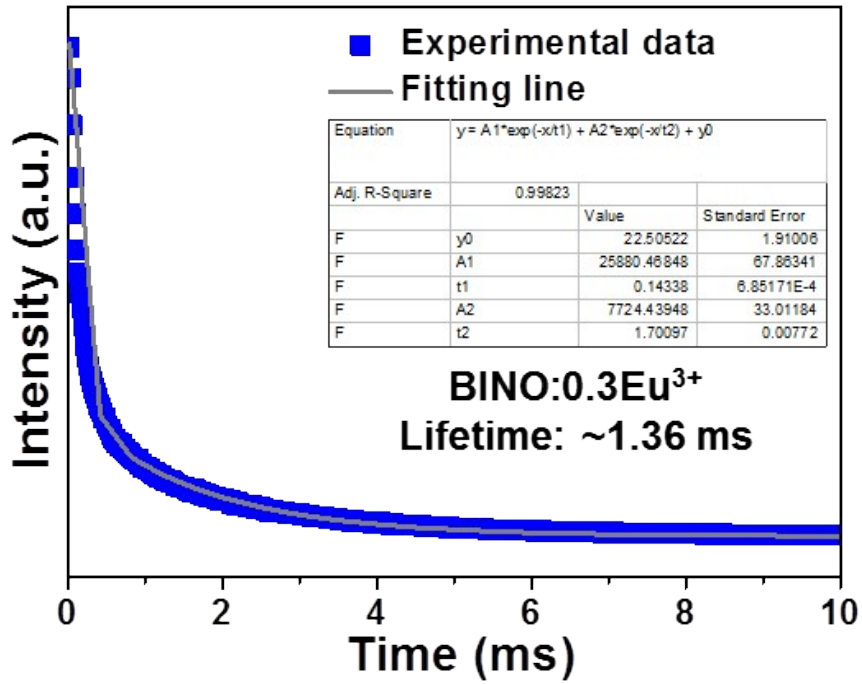

Fig. S14 Decay curve of the BINO:0.3Eu<sup>3+</sup> phosphor.

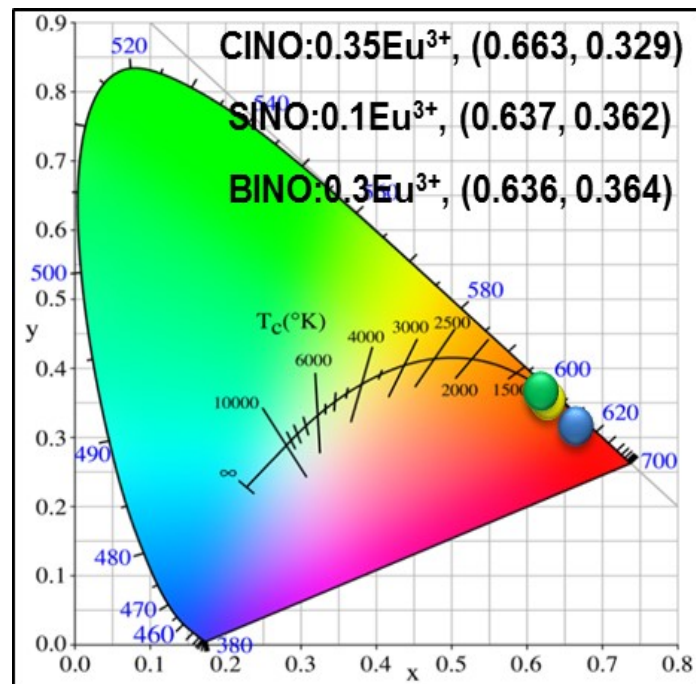

Fig. S15 Chromaticity coordinates of the optimal resultant samples.



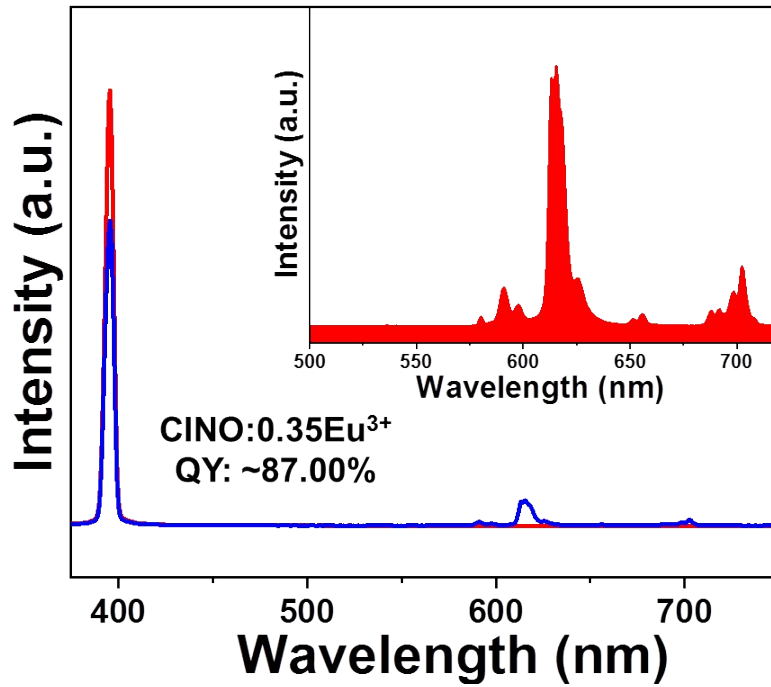

Fig. S16 Quantum yield pattern of the CINO:0.1Eu<sup>3+</sup> phosphor.

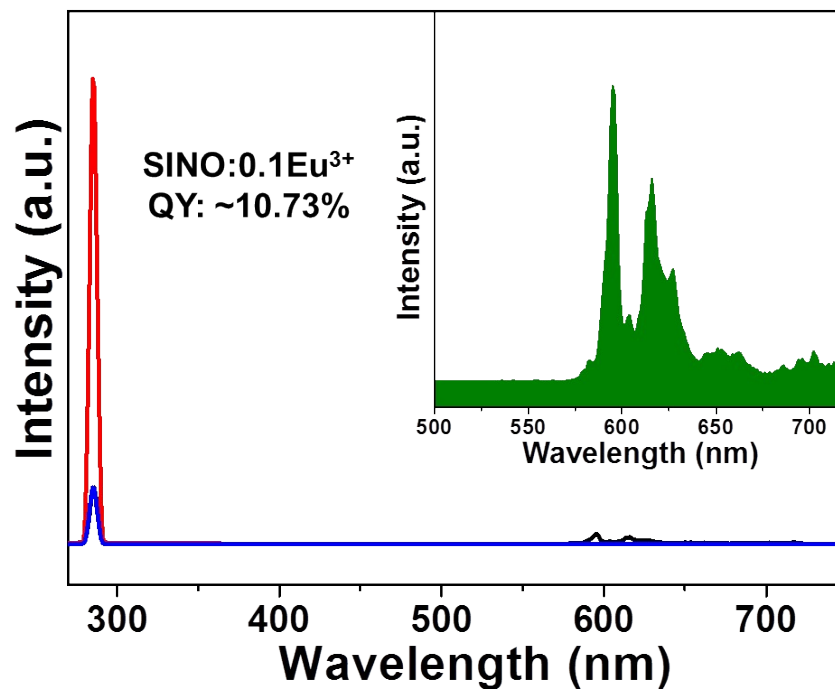

Fig. S17 Quantum yield pattern of the SINO:0.1Eu<sup>3+</sup> phosphor.



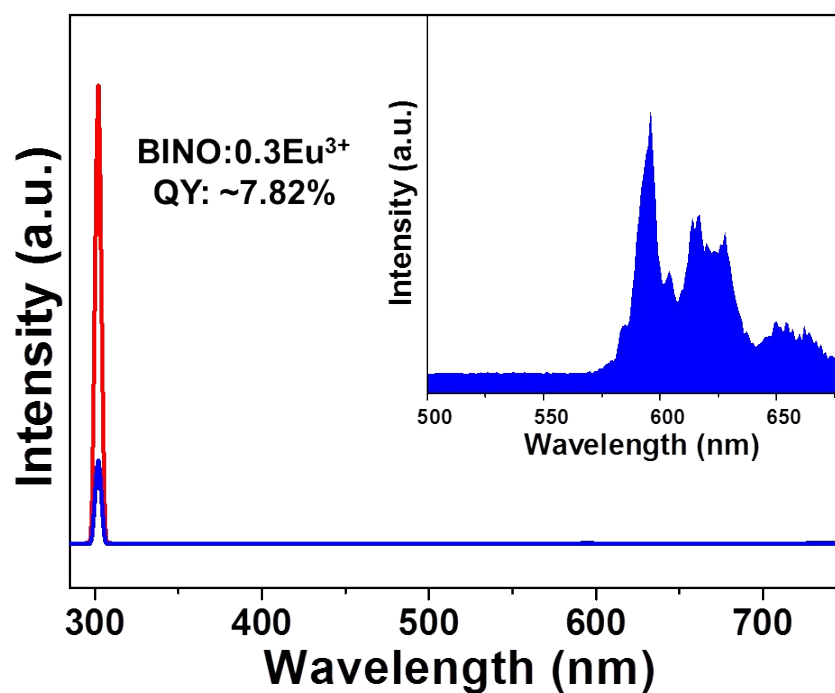

**Fig. S18** Quantum yield pattern of the BINO:0.3Eu<sup>3+</sup> phosphor.

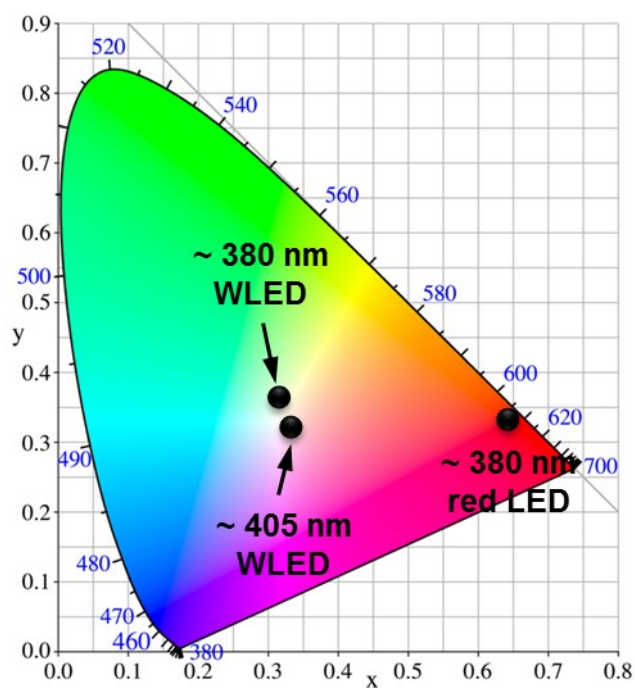

**Fig. S19** Chromaticity coordinates of the packaged LED devices under the forward current of 300 mA.
